# Supplementary material for: Value of the Lymphocyte Transformation Test for the Diagnosis of Drug-Induced Hypersensitivity Reactions in Severe Hospitalized COVID-19 Patients
Source: Preprints.org preprint supplement (doi:10.20944/preprints202306.2160.v1), 2023-06-29
Supplement: Supplementary file 3 [file supplementary]

**Supplementary Table 1.** Cytokine secretion of PBMC. Grey background corresponds to the condition where LTT was positive.

| Patient | Treatment | IFNg | IL1B | IL6 | TNFa | IL10 | IL13 | IL4 | IL5 |
| --- | --- | --- | --- | --- | --- | --- | --- | --- | --- |
| P1 | Control | 2.70 | 0.51 | 1.45 | 12.50 | 2.99 | 0.71 | 1.05 | 0.09 |
| P1 | HCQ 10 | 39.65 | 5.86 | 18.80 | 45.14 | 20.05 | 113.57 | 22.14 | 29.16 |
| P1 | LOP 5 | 0.59 | 0.32 | 0.87 | 9.12 | 1.61 | 0.02 | 0.04 | 0.00 |
| P1 | RIT 5 | 0.69 | 0.50 | 0.99 | 14.02 | 1.75 | 0.04 | 0.08 | 0.00 |
| P2 | Control | 2.69 | 0.46 | 1.96 | 9.17 | 7.63 | 0.81 | 0.22 | 0.01 |
| P2 | AZT 0.1 | 2.87 | 2.01 | 13.20 | 14.32 | 14.52 | 0.76 | 1.02 | 0.09 |
| P2 | AZT 1 | 1.18 | 0.03 | 1.36 | 13.10 | 9.40 | 1.02 | 0.33 | 0.02 |
| P2 | AZT 10 | 1.43 | 0.06 | 1.23 | 11.82 | 11.70 | 0.00 | 0.25 | 0.01 |
| P2 | RIT 5 | 0.84 | 0.00 | 0.64 | 2.88 | 4.27 | 0.00 | 0.00 | 0.00 |
| P3 | Control | 0.48 | 0.82 | 1.43 | 5.70 | 2.22 | 2.14 | 0.45 | 0.00 |
| P3 | CLA 10 | 3789.92 | 4.14 | 36.27 | 22.06 | 38.03 | 2.12 | 5.50 | 16.91 |
| P3 | CLA 100 | 2085.31 | 5.87 | 15.28 | 12.69 | 60.84 | 4.71 | 6.19 | 45.23 |
| P3 | AZT 10 | 3.90 | 0.77 | 0.86 | 6.80 | 15.19 | 1.06 | 0.31 | 0.53 |
| P3 | LOP 5 | 3.52 | 0.73 | 0.74 | 7.43 | 13.18 | 1.60 | 0.26 | 0.45 |
| P4 | Control | 0.93 | 0.82 | 2.16 | 0.01 | 5.10 | 0.01 | 0.52 | 0.02 |
| P4 | HCQ 10 | 0.58 | 0.62 | 1.56 | 5.12 | 3.82 | 0.51 | 0.08 | 0.00 |
| P4 | LOP 0.2 | 46.37 | 1.83 | 14.14 | 13.28 | 10.69 | 19.96 | 1.23 | 21.29 |
| P4 | RIT 0.2 | 19.06 | 1.52 | 15.29 | 22.34 | 9.56 | 23.42 | 1.39 | 23.85 |
| P5 | Control | 1.25 | 0.06 | 1.12 | 27.68 | 1.89 | 0.46 | 0.52 | 0.01 |
| P5 | AZT 10 | 266.52 | 2.99 | 10.31 | 11.61 | 4.18 | 2.75 | 2.31 | 1.77 |
| P5 | HCQ 1 | 79.69 | 0.58 | 2.83 | 10.77 | 1.65 | 2.25 | 1.39 | 0.83 |
| P5 | RIT 5 | 1.18 | 0.17 | 1.42 | 28.85 | 1.63 | 0.02 | 0.08 | 0.00 |
| P6 | Control | 2.70 | 0.35 | 0.85 | 0.00 | 5.80 | 2.09 | 0.89 | 0.00 |
| P6 | AZT 0.1 | 2.22 | 0.15 | 0.83 | 14.59 | 4.66 | 2.01 | 1.06 | 0.00 |
| P6 | LOP 5 | 4.12 | 0.33 | 0.79 | 3.79 | 3.91 | 0.22 | 0.13 | 0.00 |
| P6 | RIT 0.2 | 306.96 | 0.60 | 24.39 | 15.99 | 32.75 | 4.44 | 7.30 | 548.30 |
| P7 | Control | 3.79 | 1.09 | 8.36 | 76.47 | 9.32 | 2.32 | 1.86 | 0.21 |
| P7 | HCQ 10 | 4.47 | 16.46 | 14.05 | 53.79 | 4.33 | 0.10 | 0.41 | 0.11 |
| P7 | LOP 5 | 272.41 | 2.69 | 14.64 | 105.50 | 10.34 | 3.69 | 2.01 | 8.04 |
| P7 | RIT 5 | 325.94 | 53.22 | 297.45 | 116.41 | 17.67 | 22.62 | 2.96 | 8.02 |
| P8 | Control | 3.28 | 2.60 | 16.07 | 55.23 | 5.75 | 2.27 | 1.23 | 1.08 |
| P8 | HCQ 10 | 224.03 | 3.24 | 8.77 | 13.55 | 2.89 | 0.57 | 0.22 | 0.78 |
| P8 | LOP 1 | 3.51 | 23.14 | 163.08 | 113.46 | 11.22 | 3.11 | 3.03 | 109.75 |
| P8 | RIT 5 | 1007.90 | 37.16 | 113.33 | 108.12 | 11.72 | 69.17 | 4.79 | 79.15 |
| P9 | Control | 7.43 | 59.89 | 162.59 | 5.26 | 2.56 | 4.04 | 3.73 | 1.32 |
| P9 | AZT 10 | 12.29 | 112.00 | 225.52 | 3.10 | 1.04 | 1.97 | 0.87 | 1.36 |
| P9 | HCQ 10 | 58.70 | 390.50 | 317.98 | 15.95 | 3.60 | 7.75 | 5.31 | 5.27 |
| P9 | RIT 5 | 214.51 | 422.64 | 322.48 | 27.14 | 3.87 | 18.71 | 5.94 | 7.39 |
| P10 | Control | 21.32 | 32.28 | 330.47 | 35.38 | 15.77 | 6.97 | 6.69 | 0.98 |
| P10 | CLA 10 | 51.42 | 57.51 | 996.73 | 92.84 | 14.93 | 6.27 | 2.09 | 1.24 |
| P10 | AZT 10 | 127.52 | 18.24 | 268.48 | 16.06 | 10.68 | 6.80 | 6.44 | 1.49 |
| P10 | RIT 1 | 192.51 | 110.40 | 357.35 | 96.36 | 17.25 | 22.40 | 6.44 | 2.37 |
| P11 | Control | 24.39 | 0.73 | 2.43 | 10.04 | 3.14 | 2.73 | 1.23 | 0.27 |
| P11 | CLA 10 | 225.60 | 2.24 | 5.61 | 9.81 | 2.04 | 1.60 | 0.17 | 0.49 |
| P11 | LOP 5 | 1499.82 | 6.98 | 19.95 | 52.93 | 5.80 | 40.31 | 4.79 | 11.11 |
| P11 | RIT 5 | 1712.93 | 9.49 | 32.82 | 85.55 | 6.13 | 94.94 | 5.43 | 11.90 |
| NAP1 | Control | 1.49 | 4.17 | 46.66 | 7.70 | 3.79 | 1.49 | 1.39 | 0.03 |
| NAP1 | CLA 10 | 64.58 | 5.99 | 110.08 | 6.35 | 1.86 | 0.09 | 0.17 | 0.14 |
| NAP1 | AZT 10 | 83.43 | 7.95 | 159.82 | 9.96 | 2.49 | 0.15 | 0.31 | 0.17 |
| NAP1 | HCQ 10 | 62.12 | 6.25 | 117.39 | 6.19 | 1.81 | 0.08 | 0.17 | 0.12 |
| NAP1 | LOP 5 | 73.80 | 6.70 | 111.79 | 6.38 | 2.13 | 0.09 | 0.17 | 0.15 |
| NAP1 | RIT 5 | 64.40 | 5.87 | 122.30 | 6.92 | 1.86 | 0.14 | 0.22 | 0.14 |
| NAP2 | Control | 1.61 | 0.11 | 1.03 | 26.34 | 2.56 | 2.61 | 0.71 | 0.30 |
| NAP2 | CLA 10 | 1400.95 | 6.10 | 2.18 | 15.34 | 1.63 | 0.80 | 0.26 | 0.32 |
| NAP2 | AZT 10 | 1404.23 | 5.61 | 2.00 | 11.62 | 1.50 | 0.54 | 0.26 | 0.31 |
| NAP2 | HCQ 10 | 1607.63 | 6.66 | 1.97 | 14.79 | 1.99 | 0.71 | 0.36 | 0.40 |
| NAP2 | LOP 5 | 1355.74 | 5.48 | 1.37 | 13.93 | 1.61 | 0.70 | 0.26 | 0.36 |
| NAP2 | RIT 5 | 1338.73 | 4.97 | 1.68 | 12.26 | 1.54 | 0.62 | 0.22 | 0.29 |
| NAP3 | Control | 3.53 | 1.05 | 8.54 | 11.75 | 2.00 | 2.22 | 1.06 | 0.18 |
| NAP3 | CLA 10 | 64.19 | 1.05 | 25.04 | 6.96 | 1.00 | 0.10 | 0.08 | 0.08 |
| NAP3 | AZT 10 | 57.06 | 1.05 | 21.28 | 7.34 | 1.04 | 0.12 | 0.08 | 0.08 |
| NAP3 | HCQ 10 | 58.09 | 1.01 | 29.72 | 6.23 | 1.00 | 0.11 | 0.08 | 0.11 |
| NAP3 | LOP 5 | 48.71 | 0.75 | 24.38 | 4.93 | 0.95 | 0.07 | 0.04 | 0.00 |
| NAP3 | RIT 5 | 54.71 | 0.72 | 23.03 | 5.53 | 0.99 | 0.10 | 0.13 | 0.04 |
| NAP4 | Control | 1.74 | 0.21 | 1.07 | 17.81 | 1.65 | 2.78 | 0.71 | 0.62 |
| NAP4 | CLA 10 | 966.36 | 10.17 | 153.57 | 31.01 | 3.11 | 2.37 | 0.41 | 2.26 |
| NAP4 | AZT 10 | 936.87 | 9.49 | 134.17 | 28.55 | 2.97 | 1.88 | 0.31 | 2.04 |
| NAP4 | HCQ 10 | 1032.46 | 11.52 | 146.58 | 31.30 | 3.24 | 2.81 | 0.41 | 2.27 |
| NAP4 | LOP 5 | 1027.91 | 9.60 | 138.93 | 32.69 | 3.02 | 2.60 | 0.46 | 1.95 |
| NAP4 | RIT 5 | 868.21 | 7.84 | 91.88 | 22.92 | 2.26 | 2.01 | 0.41 | 1.40 |
| NAP5 | Control | 1.38 | 0.29 | 0.45 | 15.87 | 0.62 | 3.77 | 0.17 | 1.31 |
| NAP5 | CLA 10 | 1457.34 | 1.16 | 4.73 | 20.05 | 0.72 | 6.64 | 0.26 | 1.05 |
| NAP5 | AZT 10 | 1321.37 | 1.27 | 5.64 | 21.80 | 0.76 | 6.81 | 0.26 | 1.11 |
| NAP5 | HCQ 10 | 1514.97 | 1.22 | 5.49 | 18.48 | 0.90 | 8.08 | 0.31 | 1.17 |
| NAP5 | LOP 5 | 1363.68 | 1.35 | 4.65 | 16.49 | 0.76 | 6.27 | 0.26 | 1.17 |
| NAP5 | RIT 5 | 1343.49 | 1.10 | 4.24 | 20.12 | 0.72 | 5.53 | 0.24 | 0.97 |
